# Supplementary material for: Meta-analysis of commonly mutated genes in leptomeningeal carcinomatosis
Source: PeerJ journal article supplement (doi:10.7717/peerj.15250), 2023-04-19

| GO:BP                                                      |            | stats                  |                                        |  |   | TP53 | PIK3CA | KMT2D | PTEN | L7R |
|------------------------------------------------------------|------------|------------------------|----------------------------------------|--|---|------|--------|-------|------|-----|
| Term name                                                  | Term ID    | P <sub>adj</sub>       | -log <sub>10</sub> (P <sub>adj</sub> ) |  | 0 | 16   |        |       |      |     |
| regulation of lymphocyte apoptotic process                 | GO:0070228 | 1.574×10 <sup>-4</sup> |                                        |  |   |      |        |       |      |     |
| lymphocyte apoptotic process                               | GO:0070227 | 3.727×10 <sup>-4</sup> |                                        |  |   |      |        |       |      |     |
| regulation of fibroblast apoptotic process                 | GO:2000269 | 4.882×10 <sup>-4</sup> |                                        |  |   |      |        |       |      |     |
| regulation of leukocyte apoptotic process                  | GO:2000106 | 5.210×10 <sup>-4</sup> |                                        |  |   |      |        |       |      |     |
| developmental growth                                       | GO:0048589 | 6.375×10 <sup>-4</sup> |                                        |  |   |      |        |       |      |     |
| fibroblast apoptotic process                               | GO:0044346 | 6.820×10 <sup>-4</sup> |                                        |  |   |      |        |       |      |     |
| leukocyte apoptotic process                                | GO:0071887 | 1.158×10 <sup>-3</sup> |                                        |  |   |      |        |       |      |     |
| positive regulation of signal transduction                 | GO:0009967 | 1.432×10 <sup>-3</sup> |                                        |  |   |      |        |       |      |     |
| negative regulation of macroautophagy                      | GO:0016242 | 2.136×10 <sup>-3</sup> |                                        |  |   |      |        |       |      |     |
| regulation of cell population proliferation                | GO:0042127 | 2.333×10 <sup>-3</sup> |                                        |  |   |      |        |       |      |     |
| positive regulation of cell communication                  | GO:0010647 | 2.638×10 <sup>-3</sup> |                                        |  |   |      |        |       |      |     |
| positive regulation of signaling                           | GO:0023056 | 2.670×10 <sup>-3</sup> |                                        |  |   |      |        |       |      |     |
| growth                                                     | GO:0040007 | 3.300×10 <sup>-3</sup> |                                        |  |   |      |        |       |      |     |
| cell population proliferation                              | GO:0008283 | 5.279×10 <sup>-3</sup> |                                        |  |   |      |        |       |      |     |
| positive regulation of response to stimulus                | GO:0048584 | 8.056×10 <sup>-3</sup> |                                        |  |   |      |        |       |      |     |
| peptidyl-amino acid modification                           | GO:0018193 | 1.041×10 <sup>-2</sup> |                                        |  |   |      |        |       |      |     |
| cellular response to environmental stimulus                | GO:0104004 | 1.075×10 <sup>-2</sup> |                                        |  |   |      |        |       |      |     |
| cellular response to abiotic stimulus                      | GO:0071214 | 1.075×10 <sup>-2</sup> |                                        |  |   |      |        |       |      |     |
| negative regulation of apoptotic process                   | GO:0043066 | 1.097×10 <sup>-2</sup> |                                        |  |   |      |        |       |      |     |
| negative regulation of programmed cell death               | GO:0043069 | 1.185×10 <sup>-2</sup> |                                        |  |   |      |        |       |      |     |
| negative regulation of autophagy                           | GO:0010507 | 1.251×10 <sup>-2</sup> |                                        |  |   |      |        |       |      |     |
| positive regulation of cell population proliferation       | GO:0008284 | 1.425×10 <sup>-2</sup> |                                        |  |   |      |        |       |      |     |
| negative regulation of cell death                          | GO:0060548 | 1.727×10 <sup>-2</sup> |                                        |  |   |      |        |       |      |     |
| chromatin organization                                     | GO:0006325 | 1.816×10 <sup>-2</sup> |                                        |  |   |      |        |       |      |     |
| circadian behavior                                         | GO:0048512 | 1.940×10 <sup>-2</sup> |                                        |  |   |      |        |       |      |     |
| rhythmic behavior                                          | GO:0007622 | 2.126×10 <sup>-2</sup> |                                        |  |   |      |        |       |      |     |
| regulation of T cell apoptotic process                     | GO:0070232 | 2.254×10 <sup>-2</sup> |                                        |  |   |      |        |       |      |     |
| regulation of cell aging                                   | GO:0090342 | 2.422×10 <sup>-2</sup> |                                        |  |   |      |        |       |      |     |
| regulation of generation of precursor metabolites and e... | GO:0043467 | 3.057×10 <sup>-2</sup> |                                        |  |   |      |        |       |      |     |
| regulation of cellular component size                      | GO:0032535 | 3.692×10 <sup>-2</sup> |                                        |  |   |      |        |       |      |     |
| regulation of DNA metabolic process                        | GO:0051052 | 3.723×10 <sup>-2</sup> |                                        |  |   |      |        |       |      |     |
| negative regulation of pentose-phosphate shunt             | GO:1905856 | 3.774×10 <sup>-2</sup> |                                        |  |   |      |        |       |      |     |
| negative regulation of G1 to G0 transition                 | GO:1903451 | 3.774×10 <sup>-2</sup> |                                        |  |   |      |        |       |      |     |
| regulation of transcription from RNA polymerase II prom... | GO:1990248 | 3.774×10 <sup>-2</sup> |                                        |  |   |      |        |       |      |     |
| multicellular organism growth                              | GO:0035264 | 3.958×10 <sup>-2</sup> |                                        |  |   |      |        |       |      |     |
| regulation of macroautophagy                               | GO:0016241 | 4.065×10 <sup>-2</sup> |                                        |  |   |      |        |       |      |     |
| regulation of signal transduction                          | GO:0009966 | 4.148×10 <sup>-2</sup> |                                        |  |   |      |        |       |      |     |
| cellular response to chemical stimulus                     | GO:0070887 | 4.739×10 <sup>-2</sup> |                                        |  |   |      |        |       |      |     |
| T cell apoptotic process                                   | GO:0070231 | 4.922×10 <sup>-2</sup> |                                        |  |   |      |        |       |      |     |

1 to 39 of Page 1 of 1

| REAC                                         |                 | stats                  |                                        |  |   | TP53 | PIK3CA | KMT2D | PTEN | L7R |
|----------------------------------------------|-----------------|------------------------|----------------------------------------|--|---|------|--------|-------|------|-----|
| Term name                                    | Term ID         | P <sub>adj</sub>       | -log <sub>10</sub> (P <sub>adj</sub> ) |  | 0 | 16   |        |       |      |     |
| PIP3 activates AKT signaling                 | REAC:R-HSA-1... | 9.140×10 <sup>-3</sup> |                                        |  |   |      |        |       |      |     |
| Ovarian tumor domain proteases               | REAC:R-HSA-5... | 1.329×10 <sup>-2</sup> |                                        |  |   |      |        |       |      |     |
| Intracellular signaling by second messengers | REAC:R-HSA-9... | 1.420×10 <sup>-2</sup> |                                        |  |   |      |        |       |      |     |
| Synthesis of PIPs at the plasma membrane     | REAC:R-HSA-1... | 2.502×10 <sup>-2</sup> |                                        |  |   |      |        |       |      |     |
| Regulation of TP53 Expression                | REAC:R-HSA-6... | 3.404×10 <sup>-2</sup> |                                        |  |   |      |        |       |      |     |

1 to 5 of 5 Page 1 of 1

The colors for different evidence codes in the table:

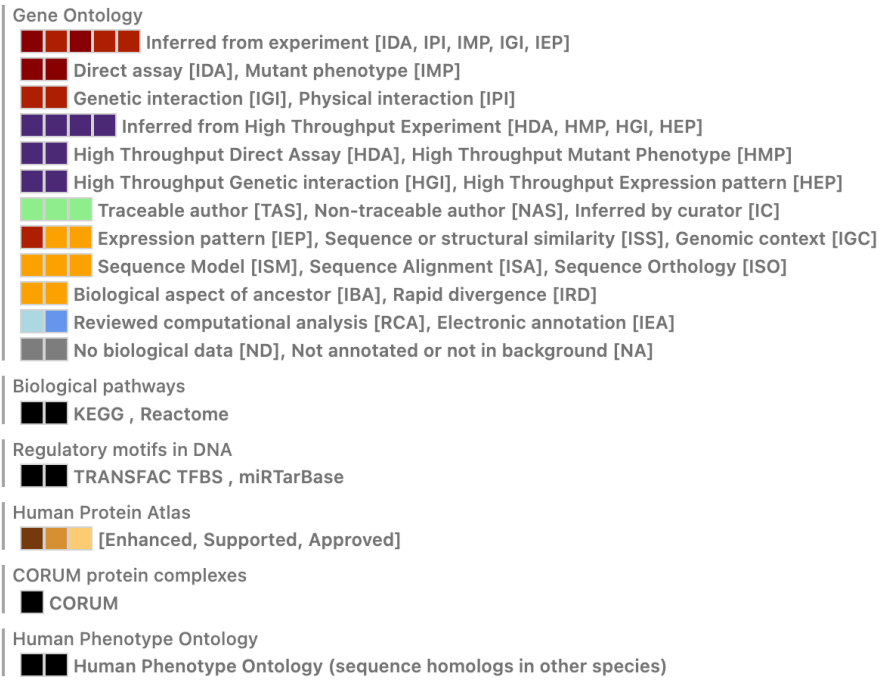

The colors for log scale:

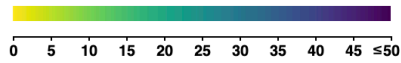

Supplement: FigureS1.pdf [file FigureS1.pdf]
