# Supplementary material for: Meta-analysis of commonly mutated genes in leptomeningeal carcinomatosis
Source: PeerJ. 2023 Apr 19;11:e15250. doi: 10.7717/peerj.15250 (PMC10122459; doi:10.7717/peerj.15250)
Supplement: Supplemental Information 3 — This study was composed of 16 publicly available articles listed in the “Selected Studies” sheet. Mutated gene lists were created with the information from each article’s results, figures, and supplementary files. Information about the mutated genes and their relevancy among patients were displayed in individual sheets with respect to their references. The “Total ratio” sheet includes all the mutated genes and their patient relevance from each study. Mutated genes observed in only one patient were discarded. All the remaining mutated genes (n ≥ 2, n = patient number) are included in the study. In addition, a table displaying commonly mutated genes according to their primary cancer type is also available. Graphs of commonly mutated genes among primary tumor types and mutated genes in NSCLC-LMC, breast-LMC, and melanoma-LMC are available. [file peerj-11-15250-s003.xlsx]

## Sheet: Selected Studies
Study	Citation	Author	DOI	Primary Tumor Location
Recurrently Mutated Genes Differ between Leptomeningeal and Solid Lung Cancer Brain Metastases	Li Y, Liu B, Connolly ID, Kakusa BW, Pan W, Nagpal S, Montgomery SB, Hayden Gephart M. Recurrently Mutated Genes Differ between Leptomeningeal and Solid Lung Cancer Brain Metastases. J Thorac Oncol. 2018 Jul;13(7):1022-1027. doi: 10.1016/j.jtho.2018.03.018. Epub 2018 Mar 29. PMID: 29604399; PMCID: PMC8407522.	Li Y et al. 2018	DOI:https://doi.org/10.1016/j.jtho.2018.03.018	NSCLC
Detection of Driver and Resistance Mutations in Leptomeningeal Metastases of NSCLC by Next-Generation Sequencing of Cerebrospinal Fluid Circulating Tumor Cells	Jiang BY, Li YS, Guo WB, Zhang XC, Chen ZH, Su J, Zhong WZ, Yang XN, Yang JJ, Shao Y, Huang B, Liu YH, Zhou Q, Tu HY, Chen HJ, Wang Z, Xu CR, Wang BC, Wu SY, Gao CY, Zhang X, Wu YL. Detection of Driver and Resistance Mutations in Leptomeningeal Metastases of NSCLC by Next-Generation Sequencing of Cerebrospinal Fluid Circulating Tumor Cells. Clin Cancer Res. 2017 Sep 15;23(18):5480-5488. doi: 10.1…	Jiang et al. 2017	DOI: 10.1158/1078-0432.CCR-17-0047	NSCLC
Unique genetic profiles from cerebrospinal fluid cell-free DNA in leptomeningeal metastases of EGFR-mutant non-small-cell lung cancer: a new medium of liquid biopsy	Li YS, Jiang BY, Yang JJ, Zhang XC, Zhang Z, Ye JY, Zhong WZ, Tu HY, Chen HJ, Wang Z, Xu CR, Wang BC, Du HJ, Chuai S, Han-Zhang H, Su J, Zhou Q, Yang XN, Guo WB, Yan HH, Liu YH, Yan LX, Huang B, Zheng MM, Wu YL. Unique genetic profiles from cerebrospinal fluid cell-free DNA in leptomeningeal metastases of EGFR-mutant non-small-cell lung cancer: a new medium of liquid biopsy. Ann Oncol. 2018 Apr 1…	Li YS et al. 2018	DOI: 10.1093/annonc/mdy009	NSCLC
Unique genomic profiles obtained from cerebrospinal fluid cell-free DNA of non-small cell lung cancer patients with leptomeningeal metastases	Ying S, Ke H, Ding Y, Liu Y, Tang X, Yang D, Li M, Liu J, Yu B, Xiang J, Mao X, Han-Zhang H, Hu W, Chen L. Unique genomic profiles obtained from cerebrospinal fluid cell-free DNA of non-small cell lung cancer patients with leptomeningeal metastases. Cancer Biol Ther. 2019;20(4):562-570. doi: 10.1080/15384047.2018.1538614. Epub 2018 Nov 5. PMID: 30395779; PMCID: PMC6422486.	Ying et al. 2019	DOI: 10.1080/15384047.2018.1538614	NSCLC
Unique Genomic Alterations of Cerebrospinal Fluid Cell-Free DNA Are Critical for Targeted Therapy of Non-Small Cell Lung Cancer With Leptomeningeal Metastasis	Wang Y, Jiang F, Xia R, Li M, Yao C, Li Y, Li H, Zhao Q, Shi M, Yu Y, Shao YW, Zhou G, Xia H, Miao L, Cai H. Unique Genomic Alterations of Cerebrospinal Fluid Cell-Free DNA Are Critical for Targeted Therapy of Non-Small Cell Lung Cancer With Leptomeningeal Metastasis. Front Oncol. 2021 Oct 4;11:701171. doi: 10.3389/fonc.2021.701171. PMID: 34671549; PMCID: PMC8522975.	Wang et al. 2021	https://doi.org/10.3389/fonc.2021.701171	NSCLC
Circulating tumor cell characterization of lung cancer brain metastases in the cerebrospinal fluid through single-cell transcriptome analysis	Ruan H, Zhou Y, Shen J, Zhai Y, Xu Y, Pi L, Huang R, Chen K, Li X, Ma W, Wu Z, Deng X, Wang X, Zhang C, Guan M. Circulating tumor cell characterization of lung cancer brain metastases in the cerebrospinal fluid through single-cell transcriptome analysis. Clin Transl Med. 2020 Dec;10(8):e246. doi: 10.1002/ctm2.246. PMID: 33377642; PMCID: PMC7737787.	Ruan et al. 2020	DOI: 10.1002/ctm2.246	NSCLC
Different next-generation sequencing pipelines based detection of tumor DNA in cerebrospinal fluid of lung adenocarcinoma cancer patients with leptomeningeal metastases	Ge M, Zhan Q, Zhang Z, Ji X, Zhou X, Huang R, Liang X. Different next-generation sequencing pipelines based detection of tumor DNA in cerebrospinal fluid of lung adenocarcinoma cancer patients with leptomeningeal metastases. BMC Cancer. 2019 Feb 12;19(1):143. doi: 10.1186/s12885-019-5348-3. PMID: 30755180; PMCID: PMC6373107.	Ge et al. 2019	DOI: 10.1186/s12885-019-5348-3	NSCLC
Detection of circulating tumor DNA from non-small cell lung cancer brain metastasis in cerebrospinal fluid samples.	Ma C, Yang X, Xing W, Yu H, Si T, Guo Z. Detection of circulating tumor DNA from non-small cell lung cancer brain metastasis in cerebrospinal fluid samples. Thorac Cancer. 2020 Mar;11(3):588-593. doi: 10.1111/1759-7714.13300. Epub 2020 Jan 13. PMID: 31944608; PMCID: PMC7049513. https://doi.org/10.1111/1759-7714.13300	Ma et al. 2020	DOI: 10.1111/1759-7714.13300	NSCLC
Clinical Utility of Cerebrospinal Fluid Cell-Free DNA as Liquid Biopsy for Leptomeningeal Metastases in ALK-Rearranged NSCLC	Zheng MM, Li YS, Jiang BY, Tu HY, Tang WF, Yang JJ, Zhang XC, Ye JY, Yan HH, Su J, Zhou Q, Zhong WZ, Yang XN, Guo WB, Chuai S, Zhang Z, Chen HJ, Wang Z, Liu C, Wu YL. Clinical Utility of Cerebrospinal Fluid Cell-Free DNA as Liquid Biopsy for Leptomeningeal Metastases in ALK-Rearranged NSCLC. J Thorac Oncol. 2019 May;14(5):924-932. doi: 10.1016/j.jtho.2019.01.007. Epub 2019 Jan 17. PMID: 30659989.	Zheng et al. 2019	DOI: 10.1016/j.jtho.2019.01.007	NSCLC
Brain tumor mutations detected in cerebral spinal fluid.	Pan W, Gu W, Nagpal S, Gephart MH, Quake SR. Brain tumor mutations detected in cerebral spinal fluid. Clin Chem. 2015 Mar;61(3):514-22. doi: 10.1373/clinchem.2014.235457. Epub 2015 Jan 20. PMID: 25605683; PMCID: PMC5412506.	Pan et al. 2015	DOI: 10.1373/clinchem.2014.235457	NSCLC
Genotyping tumour DNA in cerebrospinal fluid and plasma of a HER2-positive breast cancer patient with brain metastases	Siravegna, G., Geuna, E., Mussolin, B., Crisafulli, G., Bartolini, A., Galizia, D., Casorzo, L., Sarotto, I., Scaltriti, M., Sapino, A., Bardelli, A., & Montemurro, F. (2017). Genotyping tumour DNA in cerebrospinal fluid and plasma of a HER2-positive breast cancer patient with brain metastases. ESMO open, 2(4), e000253. https://doi.org/10.1136/esmoopen-2017-000253	Fan et al. 2018	doi: 10.1136/esmoopen-2017-000253	breast cancer
Clinical significance of detecting CSF-derived tumor cells in breast cancer patients with leptomeningeal metastasis	Li X, Zhang Y, Ding J, Wang M, Li N, Yang H, Wang K, Wang D, Lin PP, Li M, Zhao Z, Liu P. Clinical significance of detecting CSF-derived tumor cells in breast cancer patients with leptomeningeal metastasis. Oncotarget. 2017 Dec 21;9(2):2705-2714. doi: 10.18632/oncotarget.23597. PMID: 29416803; PMCID: PMC5788671.	Siravegna et al. 2017	DOI: 10.18632/oncotarget.23597	breast cancer
Cerebrospinal fluid-derived circulating tumour DNA better represents the genomic alterations of brain tumours than plasma	De Mattos-Arruda L, Mayor R, Ng CKY, Weigelt B, Martínez-Ricarte F, Torrejon D, Oliveira M, Arias A, Raventos C, Tang J, Guerini-Rocco E, Martínez-Sáez E, Lois S, Marín O, de la Cruz X, Piscuoglio S, Towers R, Vivancos A, Peg V, Ramon y Cajal S, Carles J, Rodon J, González-Cao M, Tabernero J, Felip E, Sahuquillo J, Berger MF, Cortes J, Reis-Filho JS, Seoane J. Cerebrospinal fluid-derived circulat…	Li X et al. 2017	DOI: 10.1038/ncomms9839	breast cancer
Tumor DNA in cerebral spinal fluid reflects clinical course in a patient with melanoma leptomeningeal brain metastases	Li Y, Pan W, Connolly ID, Reddy S, Nagpal S, Quake S, Gephart MH. Tumor DNA in cerebral spinal fluid reflects clinical course in a patient with melanoma leptomeningeal brain metastases. J Neurooncol. 2016 May;128(1):93-100. doi: 10.1007/s11060-016-2081-5. Epub 2016 Mar 9. PMID: 26961773; PMCID: PMC5412509.	De Mattos-Arruda et al. 2015	DOI: 10.1007/s11060-016-2081-5	Melanoma
Cell-Cycle and DNA-Damage Response Pathway Is Involved in Leptomeningeal Metastasis of Non–Small Cell Lung Cancer	Fan Y, Zhu X, Xu Y, Lu X, Xu Y, Wang M, Xu H, Ding J, Ye X, Fang L, Huang Z, Gong L, Lu H, Mao W, Hu M. Cell-Cycle and DNA-Damage Response Pathway Is Involved in Leptomeningeal Metastasis of Non-Small Cell Lung Cancer. Clin Cancer Res. 2018 Jan 1;24(1):209-216. doi: 10.1158/1078-0432.CCR-17-1582. Epub 2017 Oct 13. PMID: 29030356.	Li Y et al. 2016	DOI: 10.1158/1078-0432.CCR-17-1582	NSCLC
Evaluating Circulating Tumor DNA From the Cerebrospinal Fluid of Patients With Melanoma and Leptomeningeal Disease	Ballester LY, Glitza Oliva IC, Douse DY, Chen MM, Lan C, Haydu LE, Huse JT, Roy-Chowdhuri S, Luthra R, Wistuba II, Davies MA. Evaluating Circulating Tumor DNA From the Cerebrospinal Fluid of Patients With Melanoma and Leptomeningeal Disease. J Neuropathol Exp Neurol. 2018 Jul 1;77(7):628-635. doi: 10.1093/jnen/nly046. PMID: 29873738; PMCID: PMC6005029.	Ballester et al. 2018	DOI: 10.1093/jnen/nly046	Melanoma

## Sheet: Total ratio
	Gene Name	Li Y et al. 2018	Mutation+ 1	All 1	Jiang et al. 2017	Mutation+ 2	All 2	Li YS et al. 2018	Mutation+ 3	All 3	Shenpeng et al. 2019	Mutation+ 4	All 4	Wang et al. 2021	Mutation+ 5	All 5	Ruan et al. 2020	Mutation+ 6	All 6	Ge et al. 2019	Mutation+ 7	All 7	Ma et al. 2020	Mutation+ 8	All 8	Zheng et al. 2019	Mutation+ 9	All 9	Pan et al. 2015	Mutation+ 10	All 10	Fan et al. 2018	Mutation+ 11	All 11	Siravegna et al. 2017	Mutation+ 12	All 12	Li X et al. 2017	Mutation+ 13	All 13	De Mattos-Arruda et al. 2015	Mutation+ 14	All 14	Li Y et al. 2016	Mutation+ 15	All 15	Ballester et al. 2018	Mutation+ 16	Alll 16
	EGFR	0.875	7	8	0.944444	17	18	1	26	26	0.773333	58	75	0.555556	40	72	0.666667	2	3	0.555556	10	18	1	11	11	0.166667	2	10	1	1	1													1	8	8
	TP53	0.625	5	8				0.807692	21	26	0.64	48	75	0.513889	37	72	1	3	3	0.222222	4	18	0.545455	6	11	0.5	5	10	1	1	1	1	1	1	1	2	2	0.333333	1	3							0.142857	1	7
	ERBB2				0.0555556	1	18	0.115385	3	26	0.08	6	75	0.0694444	5	72							0.0909091	1	11
	RB1							0.153846	4	26	0.0933333	7	75	0.194444	14	72										0.1	1	10
	MYC							0.615385	16	26	0.106667	8	75	0.222222	16	72										0.2	2	10
	NTRK1							0.153846	4	26	0.16	12	75	0.0555556	4	72
	MET	0.125	1	8	0.166667	3	18	0.5	13	26	0.253333	19	75										0.181818	2	11	0.1	1	10																			0.142857	1	7
	AR										0.04	3	75	0.0416667	3	72
	ALK							0.115385	3	26	0.133333	10	75				0.666667	2	3	0.0555556	1	18				0.3	3	10
	RET				0.0555556	1	18	0.0384615	1	26	0.0133333	1	75										0.0909091	1	11																1	1	1
	APC							0.115385	3	26	0.12	9	75										0.181818	2	11	0.1	1	10																			0.142857	1	7
	FGFR1	0.125	1	8				0.423077	11	26	0.0933333	7	75							0.0555556	1	18
	PTEN							0.0384615	1	26	0.04	3	75										0.181818	2	11													0.333333	1	3	1	1	1	0.125	1	8
	KRAS							0.153846	4	26	0.0266667	2	75				0.333333	1	3	0.0555556	1	18
	CDKN2A							0.423077	11	26	0.133333	10	75													0.3	3	10																			0.142857	1	7
	PIK3CA	0.125	1	8	0.0555556	1	18							0.0416667	3	72							0.272727	3	11							1	1	1										0.363636	4	11	0.142857	1	7
	CDK6							0.307692	8	26	0.04	3	75													0.1	1	10							0.5	1	2
	SMAD4							0.346154	9	26	0.0666667	5	75										0.181818	2	11
	NOTCH1							0.0769231	2	26	0.0266667	2	75										0.0909091	1	11
	CTNNB1							0.0384615	1	26	0.0666667	5	75										0.0909091	1	11
	NAV3							0.0384615	1	26	0.04	3	75													0.1	1	10
	KEAP1							0.192308	5	26	0.0266667	2	75													0.1	1	10
	FGF4							0.0769231	2	26	0.0666667	5	75													0.2	2	10
	CCND1							0.230769	6	26	0.0666667	5	75													0.2	2	10
	ROS1				0.0555556	1	18				0.0133333	1	75													0.1	1	10							0.5	1	2
	BRAF							0.192308	5	26	0.0666667	5	75																1	1	1										1	1	1				0.857143	6	7
	POM121L12							0.269231	7	26	0.133333	10	75
	OR4C6							0.0769231	2	26	0.0266667	2	75
	OR4A15							0.0769231	2	26	0.0666667	5	75
	FGF3							0.192308	5	26	0.08	6	75
	FGF19							0.192308	5	26	0.0533333	4	75
	CSMD3							0.230769	6	26	0.0266667	2	75
	CDK4							0.230769	6	26	0.12	9	75
	BRCA1							0.153846	4	26	0.0533333	4	75
	BRINP3										0.0266667	2	75													0.1	1	10
	BRCA2										0.0266667	2	75																						0.5	1	2							0.375	3	8
	IL7R													0.0833333	6	72																						0.333333	1	3	1	1	1
	PIK3R1							0.115385	3	26	0.04	3	75
	PIK3CG										0.0266667	2	75
	OR2T4										0.04	3	75
	GNAS													0.0416667	3	72																						0.333333	1	3
	CDH18										0.04	3	75
	AKT3													0.0416667	3	72																						0.333333	1	3
	TERT													0.0972222	7	72
	RICTOR													0.125	9	72
	PTK2													0.0416667	3	72
	NKX2-1													0.152778	11	72
	MCL1													0.0694444	5	72
	CREBBP													0.0416667	3	72
	CCNE1													0.0416667	3	72
	AKT2													0.0694444	5	72
	ABCB1													0.0416667	3	72
	STK11							0.230769	6	26													0.0909091	1	11
	THSD7A							0.0384615	1	26																0.1	1	10
	OR6F1							0.115385	3	26																0.1	1	10
	GATA3							0.0769231	2	26																									0.5	1	2	0.333333	1	3
	KDM5A							0.0769231	2	26																									0.5	1	2
	EML4-ALK				0.111111	2	18																			0.5	5	10
	TNR							0.0384615	1	26
	SPTA1							0.153846	4	26
	SPOP							0.0384615	1	26
	SOX2							0.0769231	2	26
	SNTG1							0.0384615	1	26
	OR5L2							0.0769231	2	26
	MTOR							0.0769231	2	26
	GFRAL							0.0384615	1	26
	FGFR3							0.0769231	2	26
	ERBB3							0.0384615	1	26
	ARID1A							0.0384615	1	26
	AKT1							0.115385	3	26
	GNAQ																						0.0909091	1	11																						0.142857	1	7
	KIT																						0.454545	5	11										0.5	1	2
	KMT2D																												1	1	1				0.5	1	2				1	1	1	0.875	7	8
	VHL																						0.0909091	1	11
	SMARCB1																						0.181818	2	11
	MLH1																						0.0909091	1	11
	KDR																						0.181818	2	11
	JAK3																						0.0909091	1	11
	FLT3																						0.0909091	1	11
	FGFR2																						0.0909091	1	11
	FGFR																						0.0909091	1	11
	FBXW7																						0.181818	2	11
	ERBB4																						0.0909091	1	11
	ATM																						0.181818	2	11
	TRPC5																									0.1	1	10
	PDE4DIP	0.375	3	8																															0.5	1	2
	NFE2L2																									0.1	1	10
	MTA3-ALK																									0.1	1	10
	LOC101929378-ALK																									0.1	1	10
	KMT2C																																		1	2	2							1	8	8
	HIP1-ALK																									0.1	1	10
	GPD2-ALK																									0.1	1	10
	FSHR-ALK																									0.0833333	1	10
	ARID1B																																		0.5	1	2							0.375	3	8
	TP53BP1																																											0.375	3	8
	TAS2R31	0.625	5	8
	TAF1																																											0.5	4	8
	SMC1A																																											0.375	3	8
	RAD51AP2																																											0.5	4	8
	RAD50																																											0.75	6	8
	PRKDC																																											0.375	3	8
	NPM1																																											0.625	5	8
	MSH3																																											0.5	4	8
	MLH3																																											0.5	4	8
	MED12																																											0.5	4	8
	CHEK1																																											0.75	6	8
	CDK8																																											0.75	6	8
	ATRX																																											0.375	3	8
	NRAS																																														0.857143	6	7
	ABL1																																														0.142857	1	7
	MAP3K1																																		0.5	1	2	0.333333	1	3
	PMS2																																		1	2	2				1	1	1
	POLE																																					0.333333	1	3
	PIK3C2G																																					0.333333	1	3
	ESR1																																					0.333333	1	3
	CDC73																																					0.333333	1	3
	ARID5B																																					0.333333	1	3
	ZRSR2																																		0.5	1	2
	ZNF331																																		0.5	1	2
	ZNF276																																		0.5	1	2
	XPC																																		0.5	1	2
	WRN																																		0.5	1	2
	WDR36																																		0.5	1	2
	VTI1A																																		0.5	1	2
	USP6																																		0.5	1	2
	TYK2																																		0.5	1	2
	TRIP11																																		0.5	1	2
	TFRC																																		0.5	1	2
	TET2																																		1	2	2
	TCF7L2																																		0.5	1	2
	TAL2																																		0.5	1	2
	STIL																																		0.5	1	2
	SS18																																		0.5	1	2
	SETD2																																		0.5	1	2
	PTPRD																																		0.5	1	2
	PRDM1																																		0.5	1	2
	PCSK7																																		0.5	1	2
	PBX1																																		0.5	1	2
	PAFAH1B2																																		0.5	1	2
	NUTM2B																																		0.5	1	2
	NUTM2A																																		0.5	1	2
	NUTM1																																		0.5	1	2
	NSD1																																		0.5	1	2
	NOTCH4																																		0.5	1	2
	NOTCH2																																		1	2	2
	NIN																																		0.5	1	2
	NBN																																		0.5	1	2
	NACA																																		0.5	1	2
	MTUS2																																		0.5	1	2
	MLLT4																																		0.5	1	2
	KLK2																																		0.5	1	2
	KIF1B																																		0.5	1	2
	KIAA1549																																		0.5	1	2
	KAT6A																																		0.5	1	2
	JAK1																																		0.5	1	2
	HSP90AA1																																		0.5	1	2
	HMGA2																																		0.5	1	2
	HIP1																																		0.5	1	2
	GOLGA5																																		0.5	1	2
	FNBP1																																		0.5	1	2
	FIP1L1																																		0.5	1	2
	EZH2																																		0.5	1	2
	ERCC4																																		0.5	1	2
	EPS15																																		0.5	1	2
	EPHB6																																		1	2	2
	EML4																																		0.5	1	2
	EIF4A2																																		0.5	1	2
	DICER1																																		0.5	1	2
	DDX6																																		0.5	1	2
	DDX10																																		0.5	1	2
	DDB2																																		0.5	1	2
	CNTRL																																		0.5	1	2
	CLTCL1																																		1	2	2
	CBLB																																		0.5	1	2
	CASC5																																		0.5	1	2
	BLM																																		0.5	1	2
	BCL3																																		0.5	1	2
	ATR																																		0.5	1	2
	ARID4A																																		0.5	1	2
	ARID2																																		1	2	2
	AMER1																																		0.5	1	2
	ALDH2																																		1	2	2
	AFF3																																		0.5	1	2
	AFF1																																		0.5	1	2
	WWC1																															1	1	1
	WHSC1																															1	1	1
	WDR60																															1	1	1
	WDR25																															1	1	1
	TSC2																												1	1	1
	TPR																												1	1	1
	SYNE1																															1	1	1
	NSD1																												1	1	1
	NFYB																															1	1	1
	MAML1																															1	1	1
	GSX2																															1	1	1
	FAM186A																															1	1	1
	CREB3L1																												1	1	1
	C17orf102																															1	1	1
	AP2A1																															1	1	1
	MLLT6
	FANCA
[truncated: 13 more columns]

## Sheet: Commonly mutated genes graph
Row Labels	# Mutants	# Patients
NSCLC+Breast+Melanoma	176	577
IL7R	8	76
KMT2D	10	12
PIK3CA	14	128
PTEN	9	124
TP53	135	237
NSCLC+Breast	62	555
AKT3	4	75
ARID1B	4	10
BRCA2	6	85
CDK6	13	113
GATA3	4	31
GNAS	4	75
KDM5A	3	28
KIT	6	13
KMT2C	10	10
PDE4DIP	4	10
ROS1	4	105
NSCLC+Melanoma	100	654
APC	16	129
BRAF	12	103
CDKN2A	25	118
GNAQ	2	18
MET	40	155
RET	5	131
Breast+Melanoma	3	3
PMS2	3	3
Grand Total	341	1789

## Sheet: mut+ among cancer groups graph
Row Labels	# Patients	# Mutants
NSCLC2	4615	650
EGFR	250	182
ERBB2	202	16
MYC	183	42
RB1	183	26
NTRK1	173	20
AR	147	6
ALK	132	19
FGFR1	127	20
KRAS	122	8
CTNNB1	112	7
NOTCH1	112	5
SMAD4	112	16
KEAP1	111	8
CCND1	111	13
NAV3	111	5
FGF4	111	9
CSMD3	101	8
OR4C6	101	4
FGF3	101	11
BRCA1	101	8
OR4A15	101	7
CDK4	101	15
FGF19	101	9
POM121L12	101	17
BRINP3	85	3
PI3KCG	75	2
CDH18	75	3
ORT2T4	75	3
PI3KR1	75	3
NKX2-1	72	11
AKT2	72	5
CREBBP	72	3
PTK2	72	3
CCNE1	72	3
RICTOR	72	9
MCL1	72	5
ABCB1	72	3
TERT	72	7
STK11	37	7
OR6F1	36	4
THSD7A	36	2
EML4-ALK	28	7
SOX2	26	2
MTOR	26	2
OR5L2	26	2
SPTA1	26	4
PIK3R1	26	3
FGFR3	26	2
AKT1	26	3
SMARCB1	11	2
KDR	11	2
FBXW7	11	2
ATM	11	2
CHEK1	8	6
SMC1A	8	3
RAD50	8	6
NPM1	8	5
TAS2R31	8	5
TAF1	8	4
RAD51AP2	8	4
CDK8	8	6
ATRX	8	3
PRKDC	8	3
MED12	8	4
TP53BP1	8	3
MLH3	8	4
MSH3	8	4
Melanoma	7	6
NRAS	7	6
Breast	17	14
MAP3K1	5	2
NOTCH2	2	2
ALDH2	2	2
ARID2	2	2
TET2	2	2
CLTCL1	2	2
EPHB6	2	2
Grand Total	4639	670

## Sheet: NSCLC-LMC mut+ genes
Gene Name	Mutants	Patients
EGFR	182	250
TP53	130	224
ERBB2	16	202
MYC	42	183
RB1	26	183
NTRK1	20	173
MET	39	148
AR	6	147
ALK	19	132
RET	4	130
FGFR1	20	127
APC	15	122
KRAS	8	122
PIK3CA	12	120
PTEN	7	120
SMAD4	16	112
CTNNB1	7	112
NOTCH1	5	112
CDKN2A	24	111
CCND1	13	111
CDK6	12	111
FGF4	9	111
KEAP1	8	111
NAV3	5	111
ROS1	3	103
BRAF	11	102
POM121L12	17	101
CDK4	15	101
FGF3	11	101
FGF19	9	101
CSMD3	8	101
BRCA1	8	101
OR4A15	7	101
OR4C6	4	101
PIK3R1	6	101
BRINP3	3	85
BRCA2	5	83
OR2T4	3	75
CDH18	3	75
PIK3CG	2	75
NKX2-1	11	72
RICTOR	9	72
TERT	7	72
IL7R	6	72
MCL1	5	72
AKT2	5	72
GNAS	3	72
AKT3	3	72
PTK2	3	72
CREBBP	3	72
CCNE1	3	72
ABCB1	3	72
STK11	7	37
OR6F1	4	36
THSD7A	2	36
SPTA1	4	26
AKT1	3	26
GATA3	2	26
KDM5A	2	26
SOX2	2	26
OR5L2	2	26
MTOR	2	26
FGFR3	2	26
GNAQ	2	18
KIT	5	11
SMARCB1	2	11
KDR	2	11
FBXW7	2	11
ATM	2	11
KMT2D	8	9
KMT2C	8	8
RAD50	6	8
CHEK1	6	8
CDK8	6	8
TAS2R31	5	8
NPM1	5	8
TAF1	4	8
RAD51AP2	4	8
MSH3	4	8
MLH3	4	8
MED12	4	8
PDE4DIP	3	8
ARID1B	3	8
TP53BP1	3	8
SMC1A	3	8
PRKDC	3	8
ATRX	3	8

## Sheet: Breast-LMC mut+ genes
Genes	Mutants	Patients
TP53	4	6
MAP3K1	2	5
GATA3	2	5
TET2	2	2
NOTCH2	2	2
EPHB6	2	2
CLTCL1	2	2
ARID2	2	2
ALDH2	2	2
KMT2C	2	2
PMS2	2	2

## Sheet: Melanoma-LMC mut+ genes
Genes	Mutants	Patients
BRAF	7	8
NRAS	6	7

## Sheet: Li Y et al. 2018
Gene Name	Ratio	Mutation +	All
TAS2R31	0.625	5	8
PDE4DIP	0.375	3	8
EGFR	0.875	7	8
TP53	0.625	5	8
PIK3CA	0.125	1	8
FGFR1	0.125	1	8
MET	0.125	1	8

## Sheet: Jiang et al. 2017
Gene Name	Mutation +	All	Ratio			Gene Name	Ratio
EGFR	17	18	0.944444			EGFR	0.944444
EML4-ALK	2	18	0.111111			EML4-ALK	0.111111
ERBB2	1	18	0.0555556			ERBB2	0.0555556
MET	3	18	0.166667			MET	0.166667
PI3KCA	1	18	0.0555556			PI3KCA	0.0555556
RET	1	18	0.0555556			RET	0.0555556
ROS1	1	18	0.0555556			ROS1	0.0555556

## Sheet: Li YS et al. 2018
Gene Name	Ratio	Mutation +	All
AKT1	0.115385	3	26
ALK	0.115385	3	26
APC	0.115385	3	26
ARID1A	0.0384615	1	26
BRAF	0.192308	5	26
BRCA1	0.153846	4	26
CCND1	0.230769	6	26
CDK4	0.230769	6	26
CDK6	0.307692	8	26
CDKN2A	0.423077	11	26
CSMD3	0.230769	6	26
CTNNB1	0.0384615	1	26
EGFR	1	26	26
ERBB2	0.115385	3	26
ERBB3	0.0384615	1	26
FGF19	0.192308	5	26
FGF3	0.192308	5	26
FGF4	0.0769231	2	26
FGFR1	0.423077	11	26
FGFR3	0.0769231	2	26
GATA3	0.0769231	2	26
GFRAL	0.0384615	1	26
KDM5A	0.0769231	2	26
KEAP1	0.192308	5	26
KRAS	0.153846	4	26
MET	0.5	13	26
MTOR	0.0769231	2	26
MYC	0.615385	16	26
NAV3	0.0384615	1	26
NOTCH1	0.0769231	2	26
NTRK1	0.153846	4	26
OR4A15	0.0769231	2	26
OR4C6	0.0769231	2	26
OR5L2	0.0769231	2	26
OR6F1	0.115385	3	26
PIK3R1	0.115385	3	26
POM121L12	0.269231	7	26
PTEN	0.0384615	1	26
RB1	0.153846	4	26
RET	0.0384615	1	26
SMAD4	0.346154	9	26
SNTG1	0.0384615	1	26
SOX2	0.0769231	2	26
SPOP	0.0384615	1	26
SPTA1	0.153846	4	26
STK11	0.230769	6	26
THSD7A	0.0384615	1	26
TNR	0.0384615	1	26
TP53	0.807692	21	26

[truncated: 13 more sheets: Ying et al. 2019, Wang et al. 2021, Ruan et al. 2020, Ge et al. 2019, Ma et al. 2020, Zheng et al. 2019, Pan et al. 2015, Fan et al. 2018, Siravegna et al. 2017, Li X et al. 2017, De Mattos-Arruda et al. 2015, Li Y et al. 2016, Ballester et al. 2018]
