# Supplementary material for: Meta-analysis of commonly mutated genes in leptomeningeal carcinomatosis
Source: PeerJ. 2023 Apr 19;11:e15250. doi: 10.7717/peerj.15250 (PMC10122459; doi:10.7717/peerj.15250)
Supplement: Supplemental Information 5 — The mutations are retrieved from the 16 articles that presented mutation information about the 5 common genes discussed in this study. The mutation rs number, ClinVar ID, COSMIC ID and the NCI case numbers that represent this specific mutation were given in this excel sheet. [file peerj-11-15250-s005.xlsx]

## Sheet: Mutation Info
Gene	Mutation	Mutation	Mutants	Patients	RS id	Study	Primary Tumor Location	ClinVar	COSMIC	NCI CASES	primary site
TP53	Arg158Leu	R158L	1	18	rs55819519 rs587782144 rs1567553501	Ge et al. 2019	NSCLC	633445	COSM10714	25	22 lung
	Arg196Ter	R196*	1	7	rs397516435	Ballester et al. 2018	Melanoma	43589	COSM10705	64	11 breast 4 lung 4 skin
	Arg248Gln	R248Q	4	9	rs11540652	Ruan et al. 2020 Fan et al. 2018 Siravegna et al. 2017 Li X et al. 2017	NSCLC Breast cancer	12356	COSM10662	143	8 breast 6 lung
	Arg248Trp	R248W	1	8	rs121912651	Li Y et al. 2018	NSCLC	12347	COSM10656	107	9 breast 5 lung 3 skin
	Asn281Tyr	N281Y	1	3	NA	Ruan et al. 2020 Ge et al. 2019	NSCLC	NA	NA	NA	NA
	Asp228Valfs	D228Vfs	1	18	rs2151022337	Ge et al. 2019	NSCLC	NA	COSM5025058	1	NA
	Cys135Phe	C135F	1	8	rs587781991	Li Y et al. 2018	NSCLC	NA	COSM10647	9	1 lung
	Glu92_Val93delinsX	E92_V93delins*	1	2	NA	Siravegna et al. 2017	Breast cancer
	Lys139fs	K139fs	1	8	rs1597371266	Li Y et al. 2018	NSCLC	811280	COSM44110	1	1 lung
	Ser183Ala	S183A	1	8	NA	Li Y et al. 2018	NSCLC	NA	NA	NA	NA
	Ser392fs	S392fs	1	8	NA	Li Y et al. 2018	NSCLC	NA	NA	NA	NA
	Thr338Cys	T338C	1	3	NA	Pan et al. 2015	NSCLC	NA	NA	NA	NA
	Trp53Ter	W53*	2	21	NA	Ruan et al. 2020 Ge et al. 2019	NSCLC	230285	COSM44488	6	2 lung 1 skin
					NA
	Val272Met	V272M	1	18	rs121912657	Ge et al. 2019	NSCLC	185814	COSM10891	24	2 breast 1 lung
PIK3CA	Asn107Ser	N107S	1	19	NA	Jiang et al. 2017	NSCLC		COSM1041461	2	1 lung
	Arg93Trp	R93W	1	1	rs1724342112	Fan et al. 2018	Breast cancer	1198826	COSM27493	8	NA
	Glu545Lys	E545K	6	26	rs104886003	Li Y et al. 2016 Ballester et al. 2018 Li Y et al. 2018	NSCLC Melanoma	13655	COSM763	304	83 breast 23lung 2 skin
PTEN	Tyr240Ter	Y240*	1	3	rs190070312	Li X et al. 2017	Breast cancer	572503	COSM921124	2	NA
	Arg130Ter	R130*	1	1	rs121909224	De Mattos-Arruda et al. 2015	Melanoma	7819	COSM5152	32	2 breast 1 lung 1 skin
	Arg130Gln	R130Q	1	11	rs121909229	Li Y et al. 2016	NSCLC	7829	COSM5033	59	5 breast 2 lung
IL7R	Asn412Ile	N412I	1	3	NA	Li X et al. 2017	Breast cancer	NA	NA	NA	NA
	Ile66Thr	I66T	1	1	rs1494558	De Mattos-Arruda et al. 2015	Melanoma	14839	COSM149813	NA	NA
KMT2D	Gln641Asp	Q641D	1	1	NA	De Mattos-Arruda et al. 2015	Melanoma	NA	NA	NA	NA
	Phe5309Arg	F5309R	1	2	NA	Siravegna et al. 2017	Breast cancer	NA	NA	NA	NA
	Thr5256Ala	T5256A	1	2	rs2137714700	Siravegna et al. 2017	Breast cancer	NA	NA	NA	NA
	Ala5363Val	A5363V	1	2	NA	Siravegna et al. 2017	Breast cancer	NA	NA	NA	NA
	Gln3278del	Q3278del	7	8	NA	Li Y et al. 2016	NSCLC	NA	NA	NA	NA
	Gln3861del	Q3861del	7	8	NA	Li Y et al. 2016	NSCLC	NA	NA	NA	NA
NA, not applicable
NSCLC, non-small cell lung cancer
